# Supplementary material
Source: HighWire-hosted journal article supplement (http://www.annfammed.org/highwire/filestream/8807/field_highwire_adjunct_files/0/Heil_Supp_App.pdf)
Supplement: Heil_Supp_App.pdf [file Heil_Supp_App.pdf]

**Supplemental materials for:**

Heil J, Hoebe C, Cals J, ter Waarbeek H, van Loo I, Dukers-Muijrs N. Detecting hepatitis B and C by combined public health and primary care birth cohort testing . *Ann Fam Med*. 2018;16(1):21-27.

**Supplemental Appendix 1. Comparing the distribution of socio-demographic characteristics of the testers and non-testers**

|                                                                       | <b>Testers<br/>(N=3396)<br/>% (n)</b> | <b>Non-testers<br/>(N=568)<br/>% (n)</b> | <b>OR<sup>a</sup></b> | <b>95%CI</b> |
|-----------------------------------------------------------------------|---------------------------------------|------------------------------------------|-----------------------|--------------|
| <b>Educational level</b>                                              |                                       |                                          |                       |              |
| <b>Low</b>                                                            | 47.4 (1609)                           | 30.8 (175)                               | 1.67                  | 1.33-2.10    |
| <b>Medium</b>                                                         | 23.1 (783)                            | 24.3 (138)                               | 1.28                  | 1.01-1.61    |
| <b>High</b>                                                           | 28.5 (969)                            | 41.4 (235)                               | ref                   | ***          |
| <b>Working situation</b>                                              |                                       |                                          |                       |              |
| <b>Working (part-time or full-time)</b>                               | 47.8 (1623)                           | 54.2 (308)                               | ref                   | ref          |
| <b>Retired<sup>b</sup></b>                                            | 26.5 (899)                            | 22.2 (126)                               | 1.21                  | 0.89-1.65    |
| <b>Not working (unemployed/ receiving social welfare)<sup>c</sup></b> | 24.6 (836)                            | 19.7 (112)                               | 1.24                  | 0.98-1.58    |
| <b>Living situation</b>                                               |                                       |                                          |                       |              |
| <b>Alone</b>                                                          | 24.1 (819)                            | 25.4 (144)                               | ref                   | ref          |
| <b>With partner/ children/ parents</b>                                | 75.3 (2557)                           | 71.1 (404)                               | 1.04                  | 0.85-1.29    |
| <b>Migrant</b>                                                        |                                       |                                          |                       |              |
| <b>Non-western migrant</b>                                            | 5.1 (174)                             | 5.8 (33)                                 | ref                   | ref          |
| <b>Autochthonous</b>                                                  | 80.4 (2732)                           | 78.2 (444)                               | 1.15                  | 0.77-1.71    |
| <b>Western migrant</b>                                                | 13.1 (444)                            | 13.6 (75)                                | 1.14                  | 0.72-1.79    |

Abbreviation: n, number of participants; OR, odds ratio; CI, confidence interval.

\*\*\*p≤0.001

<sup>a</sup> Adjusted for higher prevalence area, gender, and age.

<sup>b</sup> Including all retired persons (with/without work).

<sup>c</sup> Including housewives.
